# Supplementary material for: Development of optimized COI primers for biodiversity assessment: A case study of Ichthyoplankton in Vietnam
Source: Research Square preprint supplement (doi:10.21203/rs.3.rs-6219031/v1), 2025-03-31
Supplement: Supplementary file 1 [file 03ee5f0d6d941d8d00cdea0e.xlsx]

## Sheet: Sheet1
Primer names	No. sequence mapped							Total sequences on target without overlap positions	No. taxonomy
	Match	Mismatch							Phylum	Species
	0	1	2	3	4	5
Specificity (Sp)	On-target (Ot)
UPF.22	146605	190413	202400	207847	211325	217726		217726	64	30543
UPR.883	136305	218848	296128	334769	352908	363139		363139	66	60953
UPR.880	25379	192802	270095	320756	342832	352293		352293	61	58724
CSPF.25	1092	8722	28110	47974	48000	52578		203212		17798
CSPR.883	1440	9713	124855	148534	157455	157248		165173		17947
CSPR.947	95	96187	107338	128871	152727	62541		164009		17725
CSPR.950	95	96127	107328	128856	152683	62415		163868		17677
	Off-target (Oft)
		1	2	3	4	5	All-off-target	Total sequence all -off-target without overlap positions
UPF.22		43811	5997	1750	2673	15310	53595	164131
UPR.883		82543	74809	34710	32311	217193	118287	244852
UPR.880		165427	69068	34858	12282	9410	159248	193045
CSPF.25		9194	31078	54972	56034	59802	25704	177508
CSPR.883		7595	109853	12778	20287	126717	16551	148622
CSPR.947		95995	6164	7493	100838	7649	48360	115649
CSPR.950		95935	6216	7491	100740	7194	48644	115224
Ratio (Ra)	matching_Ra = (Total_sequence_non_offtarget / Total_sequences_matched *100) phylum_Ra = (Phylum_non_Oft / phylum *100) species_Ra = (Species_non_Oft / species *100)							matching_Ra	phylum_Ra	Species_Ra
UPF.22	Universal primer (UP)							75.38
UPR.883								67.43
UPR.880								54.8
CSPF.25	Chordata specific-primer design (CSP)							87.35
CSPR.883								89.98
CSPR.947								70.51
CSPR.950								70.32
Total UP	179813	261499	318580	348389	362203	369984		380524	72	57474
Total CSP	1535	105771	131596	157987	165256	166200		170459	1 (Chordata)	19165
