# Supplementary material for: Development of optimized COI primers for biodiversity assessment: A case study of Ichthyoplankton in Vietnam
Source: Research Square preprint supplement (doi:10.21203/rs.3.rs-6219031/v1), 2025-03-31
Supplement: Supplementary file 2 [file 41a95dfb5c82d9c40606961f.docx]

**Table S2**. Morphological description of invertebrate larvae in plankton samples

| Plankton species | Preminary description |
| --- | --- |
| *Canthocalanus pauper* | An elongated and segmented calanoid copepod characterized by a long tapering caudal structure, a prominent large black eye, and well-developed, elongated antennules that aid in environmental sensing and locomotion. It possesses feathery swimming legs adapted for planktonic movement, allowing efficient propulsion in aquatic environments. The species typically ranges in size from 0.5 to 1.5 mm, making it one of the larger calanoid copepods. |
| *Sepiola* sp. | A compact and rounded cephalopod with a distinct head and mantle, measuring between 1 and 5 cm in length. The body is semi-transparent, featuring densely distributed chromatophores that facilitate rapid color changes for camouflage and communication. This species possesses rounded lateral fins along the mantle, assisting in movement, along with eight arms lined with suckers and two retractable tentacles specialized for prey capture. |
| *Linatella caudata* | A gastropod species with a globular, somewhat elongated, thick-walled shell that features a broad aperture and a smooth inner lip, characteristic of Linatella caudata. The shell surface exhibits a combination of spiral ridges and axial folds, giving it a distinct textured appearance. The coloration varies from light beige to brown, sometimes displaying darker bands or mottled patterns. This species possesses a relatively small operculum compared to its shell size. Adult specimens can grow significantly, reaching lengths between 60 and 150 mm. |
| *Tiaropsis* sp*.* | A hydrozoan medusa with a small, bell-shaped, gelatinous body that appears translucent, revealing its internal structures. This species is equipped with well-developed tentacles arranged around the margin of the bell, which aid in prey capture, along with a tubular manubrium essential for feeding. *Tiaropsis* species typically range from a few millimeters to centimeters in diameter. Like other cnidarians, it possesses nematocysts, or stinging cells, which serve both as a means of capturing prey and as a defensive mechanism against potential threats. |
| *Zonosagitta bedoti* | A chaetognath species characterized by an elongated, slender, and transparent body with clearly defined head, trunk, and tail regions. The rounded head is equipped with distinctive hooks and spines, which are crucial for capturing prey. It has well-developed paired lateral fins and a caudal fin, each exhibiting characteristic fin ray patterns that aid in movement and stability. The presence of robust grasping spines on the head enhances its predatory efficiency. Based on scale references, the approximate body length of this species is around 5 mm. |
