# Supplementary material for: Development of optimized COI primers for biodiversity assessment: A case study of Ichthyoplankton in Vietnam
Source: Research Square preprint supplement (doi:10.21203/rs.3.rs-6219031/v1), 2025-03-31
Supplement: Supplementary file 3 [file 5c0c54414f07b749554e7d41.docx]

| **Development of optimized COI primers for biodiversity assessment: A case study of Ichthyoplankton in Vietnam**  **Sang Q. Tran1, Kien P. Tran 1, My T. L. Nguyen 1,2, Quyen V. D. Ha1, Huy Q. Pham3, Ha V. Vu4 and Binh T. Dang1***   1. Institution of Biotechnology and Environment, Nha Trang City, Khanh Hoa Province, Vietnam; 2. Institute of Oceanography, Nha Trang City, Khanh Hoa Province, Vietnam; 3. South Research Sub-Institute for Marine Fisheries, Vung Tau City, Ba Ria-Vung Tau Province, Vietnam;   Research Institute for Marine Fisheries, Hai Phong City, Vietnam;  *Corresponding author. Institution of Biotechnology and Environment, Nha Trang City, Khanh Hoa Province, Vietnam; Email: [binhdt@ntu.edu.vn](about:blank) | | | |
| --- | --- | --- | --- |
| **Data submission (**GenBank: Processing**)** | | | |
| **No.** | **Our species** | **Phylum** | **Genbank ID** |
| 1 | *Aerodramus fuciphagus* | Chordata | XXXXXXX |
| 2 | *Homo sapiens* | Chordata | XXXXXXX |
| 3 | *Omobranchus fasciolatoceps* | Chordata | XXXXXXX |
| 4 | *Parablennius thysanius* | Chordata | XXXXXXX |
| 5 | *Plagiotremus tapeinosoma* | Chordata | XXXXXXX |
| 6 | *Leiognathus berbis* | Chordata | XXXXXXX |
| 7 | *Photolateralis stercorarius* | Chordata | XXXXXXX |
| 8 | *Photopectoralis bindus* | Chordata | XXXXXXX |
| 9 | *Pteroplatytrygon violacea* | Chordata | XXXXXXX |
| 10 | *Rhinobatos jimbaranensis* | Chordata | XXXXXXX |
| 11 | *Indotestudo elongata* | Chordata | XXXXXXX |
| 12 | *Panulirus homarus* | Arthropoda | XXXXXXX |
| 13 | *Sacculina angulata* | Arthropoda | XXXXXXX |
| 14 | *Octolasmis angulata* | Arthropoda | XXXXXXX |
| 15 | *Amphipoda* sp. | Arthropoda | XXXXXXX |
| 16 | *Canthocalanus pauper* | Arthropoda | XXXXXXX |
| 17 | *Normanellidae* sp. | Arthropoda | XXXXXXX |
| 18 | *Oecophylla smaragdina* | Arthropoda | XXXXXXX |
| 19 | *Kiefferulus longilobus* | Arthropoda | XXXXXXX |
| 20 | *Mesosa* sp. | Arthropoda | XXXXXXX |
| 21 | *Sepiola* sp. | Mollusk | XXXXXXX |
| 22 | *Linatella caudata* | Mollusk | XXXXXXX |
| 23 | *Babylonia areolata* | Mollusk | XXXXXXX |
| 24 | *Pinna atropurpurea* | Mollusk | XXXXXXX |
| 25 | *Barbatia* sp. | Mollusk | XXXXXXX |
| 26 | *Nardoa variolata* | Mollusk | XXXXXXX |
| 27 | *Holothuria fuscogilva* | Mollusk | XXXXXXX |
| 28 | *Holothuria atra* | Mollusk | XXXXXXX |
| 29 | *Holothuria hilla* | Mollusk | XXXXXXX |
| 30 | *Haplorchis taichui* | Platyhelminthes | XXXXXXX |
| 31 | *Centrocestus_formosanus* | Platyhelminthes | XXXXXXX |
| 32 | *Allocreadium* sp. | Platyhelminthes | XXXXXXX |
| 33 | *Thaparocleidus* sp. | Platyhelminthes | XXXXXXX |
| 34 | *Polyacanthorhynchus* sp. | Acanthocephala | XXXXXXX |
| 35 | *Raphidascaris trichiuri* | Chordata | XXXXXXX |
| 36 | *Heteractis aurora* | Cnidaria | XXXXXXX |
| 37 | *Tiaropsis* sp. | Cnidaria | XXXXXXX |
| 38 | *Zonosagitta bedoti* | Chaetognatha | XXXXXXX |
| 39 | *Dinophilus* sp. | Annelida | XXXXXXX |
| 40 | *Leiognathus berbis* | Chordata | XXXXXXX |
| 41 | *Photolateralis stercorarius* | Chordata | XXXXXXX |
| 42 | *Photopectoralis bindus* | Chordata | XXXXXXX |
| 43 | *Pempheris schwenkii* | Chordata | XXXXXXX |
| 44 | *Ophichthidae* sp. | Chordata | XXXXXXX |
| 45 | *Gymnothorax buroensis* | Chordata | XXXXXXX |
| 46 | *Callechelys* sp. | Chordata | XXXXXXX |
| 47 | *Synodus dermatogenys* | Chordata | XXXXXXX |
| 48 | *Saurida microlepis* | Chordata | XXXXXXX |
| 49 | *Trachinocephalus myops* | Chordata | XXXXXXX |
| 50 | *Gerres* sp. | Chordata | XXXXXXX |
| 51 | *Omobranchus fasciolatoceps* | Chordata | XXXXXXX |
| 52 | *Parablennius thysanius* | Chordata | XXXXXXX |
| 53 | *Plagiotremus tapeinosoma* | Chordata | XXXXXXX |
| 54 | *Callionymus* sp. | Chordata | XXXXXXX |
| 55 | *Callionymus meridionalis* | Chordata | XXXXXXX |
| 56 | *Callionymus schaapii* | Chordata | XXXXXXX |
| 57 | *Alepes kleinii* | Chordata | XXXXXXX |
| 58 | *Selaroides leptolepis* | Chordata | XXXXXXX |
| 59 | *Megalaspis cordyla* | Chordata | XXXXXXX |
| 60 | *Sardinella fijiensis* | Chordata | XXXXXXX |
| 61 | *Encrasicholina heteroloba* | Chordata | XXXXXXX |
| 62 | *Encrasicholina punctifer* | Chordata | XXXXXXX |
| 63 | *Stolephorus insularis* | Chordata | XXXXXXX |
| 64 | *Thryssa hamiltonii* | Chordata | XXXXXXX |
| 65 | *Pterocaesio digramma* | Chordata | XXXXXXX |
| 66 | *Halichoeres nigrescens* | Chordata | XXXXXXX |
| 67 | *Nemipterus furcosus* | Chordata | XXXXXXX |
| 68 | *Nemipterus japonicus* | Chordata | XXXXXXX |
| 69 | *Pentapodus setosus* | Chordata | XXXXXXX |
| 70 | *Scolopsis taenioptera* | Chordata | XXXXXXX |
| 71 | *Scaridae* sp. | Chordata | XXXXXXX |
| 72 | *Johnius carouna* | Chordata | XXXXXXX |
| 73 | *Sillago sihama* | Chordata | XXXXXXX |
| 74 | *Sparus aurata* | Chordata | XXXXXXX |
| 75 | *Acentrogobius* sp. | Chordata | XXXXXXX |
| 76 | *Boleophthalmus pectinirostris* | Chordata | XXXXXXX |
| 77 | *Gobiidae* sp. | Chordata | XXXXXXX |
| 78 | *Oxuderces dentatus* | Chordata | XXXXXXX |
| 79 | *Osteomugil* sp. | Chordata | XXXXXXX |
| 80 | *Planiliza macrolepis* | Chordata | XXXXXXX |
| 81 | *Crenimugil buchanani* | Chordata | XXXXXXX |
| 82 | *Bythitidae* sp. | Chordata | XXXXXXX |
| 83 | *Mugilidae* sp. | Chordata | XXXXXXX |
| 84 | *Abudefduf bengalensis* | Chordata | XXXXXXX |
| 85 | *Neopomacentrus bankieri* | Chordata | XXXXXXX |
| 86 | *Ambassis gymnocephalus* | Chordata | XXXXXXX |
| 87 | *Parascorpaena aurita* | Chordata | XXXXXXX |
| 88 | *Epinephelus bleekeri* | Chordata | XXXXXXX |
| 89 | *Thysanophrys celebica* | Chordata | XXXXXXX |
| 90 | *Parapercis filamentosa* | Chordata | XXXXXXX |
| 91 | *Sorsogona tuberculata* | Chordata | XXXXXXX |
| 92 | *Cynoglossus nanhaiensis* | Chordata | XXXXXXX |
| 93 | *Cynoglossus* sp. | Chordata | XXXXXXX |
| 94 | *Heteromycteris japonicus* | Chordata | XXXXXXX |
| 95 | *Zebrias quagga* | Chordata | XXXXXXX |
| 96 | *Trichiurus brevis* | Chordata | XXXXXXX |
| 97 | *Rastrelliger brachysoma* | Chordata | XXXXXXX |
| 98 | *Lepturacanthus savala* | Chordata | XXXXXXX |
| 99 | *Mastacembelidae* sp. | Chordata | XXXXXXX |
| 100 | *Acreichthys tomentosus* | Chordata | XXXXXXX |
| 101 | *Monacanthus chinensis* | Chordata | XXXXXXX |
| 102 | *Paramonacanthus choirocephalus* | Chordata | XXXXXXX |
