# Supplementary material for: Development of optimized COI primers for biodiversity assessment: A case study of Ichthyoplankton in Vietnam
Source: Research Square preprint supplement (doi:10.21203/rs.3.rs-6219031/v1), 2025-03-31
Supplement: Supplementary file 4 [file f14d2deec654280c969e2057.xlsx]

## Sheet: Sheet1
primer_name	abbr.	primer_f_iupac	primer_rev_iupac	start	end	length	identity	coverages	degeneracy	tm	gc	primer_f_gc_clamp	primer_rev_gc_clamp	strand
Universal primer (UP)
Oligo_1	UPR.889		TADGCTCGDGTRTCSACRTC	889	908	20	0.845	1	72	53	45		FALSE	reverse
Oligo_2*	UPR.883		TCGKGTRTCWACRTCYATTCC	883	903	21	0.846	1	32	52	42.86		TRUE	reverse
Oligo_3	UPF.76	GGWATAGTAGGMACHKCYYTAA		76	97	22	0.8	1	96	55	45.45	FALSE		forward
Oligo_4	UPF.77	GWATAGTAGGMACHKCYYTAAG		77	98	22	0.801	1	96	54	45.45	FALSE		forward
Oligo_5	UPR.842		GCTCASACRATRAAKCCTARDA	842	863	22	0.843	1	96	51	36.36		FALSE	reverse
Oligo_6*	UPR.878		GTRTCSACRTCYATTCCSACSG	878	899	22	0.848	1	64	50	40.91		TRUE	reverse
Oligo_7	UPR.880		GDGTRTCSACRTCYATTCCSAC	880	901	22	0.843	1	96	51	40.91		FALSE	reverse
Oligo_8*	UPF.22	TCWACMAAYCAYAAAGAYATYGG		22	44	23	0.864	1	64	51	30.43	TRUE		forward
Oligo_9	UPF.76	GGWATAGTAGGMACHKCYYTAAG		76	98	23	0.809	1	96	56	47.83	FALSE		forward
Oligo_10	UPR.865		ATTCCSACSGTRAAYATRTGRTG	865	887	23	0.863	1	64	50	30.43		FALSE	reverse
Oligo_11	UPR.877		GTRTCSACRTCYATTCCSACSGT	877	899	23	0.854	1	64	52	39.13		FALSE	reverse
Oligo_12*	UPR.880		TCGKGTRTCWACRTCYATTCCWAC	880	903	24	0.842	1	64	55	41.67		TRUE	reverse
Chordata-specific primer (CSP)
Oligo_1*	CSPF.25	ACMAAYCAYAAAGAYATYGG		25	44	20	0.89	0.99	32	53	45	TRUE		forward
Oligo_2	CSPR.880		GTRTCSACRTCYATTCCDAC	880	899	20	0.87	1	48	50	45		FALSE	reverse
Oligo_3	CSPR.884		TCGDGTRTCSACRTCYATTC	884	903	20	0.856	1	48	53	45		FALSE	reverse
Oligo_4	CSPR.842		CTCATACRATRAAKCCTARRA	842	862	21	0.853	0.999	32	51	38.1		FALSE	reverse
Oligo_5	CSPF.33	YAAAGAYATYGGYACYCTWTA		33	53	21	0.879	0.999	64	54	43	FALSE		forward
Oligo_6	CSPF.77	GAATAGTRGGMACHGCYYTAA		77	97	21	0.82	0.99	48	52	43	FALSE		forward
Oligo_7*	CSPR.883		TCGDGTRTCSACRTCYATTCC	883	903	21	0.863	1	48	55	47.62		TRUE	reverse
Oligo_8	CSPR.841		CTCATACRATRAAKCCTARRAR	841	862	22	0.839	0.999	64	52	36.36		FALSE	reverse
Oligo_9	CSPR.842		GCTCATACRATRAAKCCTARRA	842	863	22	0.86	0.999	32	54	40.91		FALSE	reverse
Oligo_10*	CSPR.947		ARTCARCTRAAKACTTTSACSC	947	968	22	0.883	1	64	50	31.82		TRUE	reverse
Oligo_11	CSPR.76	GGAATAGTRGGMACHGCYYTAA		76	97	22	0.82	0.99	48	55	45	FALSE		forward
Oligo_12	CSPR.77	GAATAGTRGGMACHGCYYTAAG		77	98	22	0.82	0.99	48	55	45	FALSE		forward
Oligo_13	CSPR.841		GCTCATACRATRAAKCCTARRAR	841	863	23	0.846	0.999	64	55	39.13		FALSE	reverse
Oligo_14	CSPR.858		CSGTRAAYATRTGRTGRGCTCAT	858	880	23	0.87	1	64	56	43.48		FALSE	reverse
Oligo_15*	CSPR.950		ARTCARCTRAAKACTTTSACSCC	950	972	23	0.888	1	8	53	34.78		TRUE	reverse
Oligo_16	CSPF.31	CAYAAAGAYATYGGYACYCTWTA		31	53	23	0.88	0.99	64	58	43	FALSE		forward
Oligo_17	CSPF.76	GGAATAGTRGGMACHGCYYTAAG		76	98	23	0.83	0.99	48	56	48	FALSE		forward
Oligo_18	CSPR.857		CSGTRAAYATRTGRTGRGCTCATA	857	880	24	0.875	1	64	56	41.67		FALSE	reverse
Oligo_19	CSPR.856		CSGTRAAYATRTGRTGRGCTCATAC	856	880	25	0.88	1	64	58	44		FALSE	reverse
Oligo_20	CSPR.856		ACSGTRAAYATRTGRTGRGCTCATAC	856	881	26	0.884	1	64	59	42.31		FALSE	reverse
* Choosing primers (efficiency step1)

## Sheet: Sheet2
primer_name	abbr.	primer_f_iupac	primer_rev_iupac	start	end	strand	Self-Dimer		Hetero-dimer			Stable 3' terminal (DeltaG)
Universal primer (UP) (Degeneration-reducing)							Maximum Delta G (kcal/mol)	Max base pairs (no. structure)	Forward-reverse	Maximum Delta G (kcal/mol)	Max base pairs (no. structure)
Oligo_2**	UPR.883		TCGKGTRTCWACRTCYATTCC	883	903	reverse	-37.88	4 (17)	O8-O2	-40.11	6 (27)	1.82
Oligo_6*	UPR.878		GTRTCSACRTCYATTCCSACSG	878	899	reverse	-42.98	8 (25)	O8-O6	-42.98	6 (29)	1.82
Oligo_8**	UPF.22	TCWACMAAYCAYAAAGAYATYGG		22	44	forward	-40.11	6 (21)				2.9;3.15;3.68
Oligo_12**	UPR.880		TCGKGTRTCWACRTCYATTCCWAC	880	903	reverse	-42.45	4(23)	O8-O12	-42.45	6(32)	1.82
Chordata-specific primer (CSP) (Degeneration-reducing)
Oligo_1**	CSPF.25	ACMAAYCAYAAAGAYATYGG		25	46	forward	-35.31	6(16)				0
Oligo_7**	CSPR.883		TCGKGTATCWACATCYATTCC	883	903	reverse	-36.68	4 (16)	O1-O7	-36.68	5 (23)	1.12;1.12
Oligo_10**	CSPR.947		ARTCAACTAAATACTTTSACSC	947	968	reverse	-37.02	5 (15)	O1-O10	-37.02	5 (28)	0.01; 0.28;0.3;0.99
Oligo_15**	CSPR.950		ARTCAACTAAATACTTTSACSCC	950	972	reverse	-40.9	5 (15)	O1-O15	-40.9	5 (29)	0.01; 0.28;0.3;0.99
** Choosing primers (efficiency step2)
red: not pass the filtering condition
