# Supplementary material for: Development of optimized COI primers for biodiversity assessment: A case study of Ichthyoplankton in Vietnam
Source: Research Square preprint supplement (doi:10.21203/rs.3.rs-6219031/v1), 2025-03-31
Supplement: Supplementary file 5 [file f82f32bbd10f99ca124b2e04.docx]

**Table S1: Characteristics of complete and COI mitochondrial DNA databases used for primer design and validation**

| **Database** | **pcmDB** | **filter-pcmDB** | **filter-pcmDB-5p** | **asfasta** |
| --- | --- | --- | --- | --- |
| Total No of sequences | 16.514.108 | 658.771 | 609.993 | 30.158 |
| Total No of species | 1.365.355 | 108.892 | 77.291 | 10770 |
| Arthropoda species | 1.080.487 | 64.306 | 52.452 | 3.915 |
| Chordata species | 127.270 | 27.238 | 20.060 | 6.063 |
| Mollusca species | 68.332 | 3.408 | 2.664 | 614 |
| Echinodermata species | 8.228 | 1.481 | 1.245 | 76 |
| Platyhelminthes species | 8109 | 1102 | 870 | 102 |
| Length Min. | 102 | 950 | 950 | 950 |
| Length Max. | 4.010.000p | 85.317 | 1.521 | 1.521 |
